# Supplementary material for: A dual vanadium substitution strategy for improving NASICON-type cathode materials for Na-ion batteries
Source: Royal Society of Chemistry journal article supplement (doi:10.1039/d1se00701g), 2021-01-01
Supplement: d1se00701g1.pdf [file d1se00701g1.pdf]

**Dual vanadium substitution strategy for improving NASICON-type cathode  
materials in Na-ion batteries**

P. Lavela, R. Klee, J.L. Tirado

Departamento de Química Inorgánica e Ingeniería Química. Instituto Universitario de  
Química Fina y Nanoquímica. Universidad de Córdoba.  
Edificio Marie Curie. Campus de Rabanales 14071 Córdoba (Spain)

**Table S1.** Parameters of the gaussian-lorentzian components calculated from the deconvoluted Raman spectra ascribable to the amorphous carbon phase existing in the  $\text{Na}_3\text{VCr}_{1-x}\text{Al}_x(\text{PO}_4)_3$  ( $0 \leq x \leq 1$ ) samples.

|                    |                         | D4     | D1     | D3     | G      | D2     |
|--------------------|-------------------------|--------|--------|--------|--------|--------|
| x= 0.0             | Shift/ $\text{cm}^{-1}$ | 1208.8 | 1339.2 | 1502.2 | 1597.3 | 1687.9 |
| $I_G/I_{D1}=0.471$ | FWHM / $\text{cm}^{-1}$ | 129.9  | 147.1  | 187.3  | 80.84  | 42.2   |
| x= 0.2             | Shift/ $\text{cm}^{-1}$ | 1194.1 | 1351.6 | 1502.4 | 1593.2 | 1688.0 |
| $I_G/I_{D1}=0.472$ | FWHM / $\text{cm}^{-1}$ | 175.4  | 179.6  | 125.6  | 93.1   | 100.9  |
| x= 0.4             | Shift/ $\text{cm}^{-1}$ | 1196.5 | 1339.8 | 1496.3 | 1590.6 | 1687.3 |
| $I_G/I_{D1}=0.466$ | FWHM / $\text{cm}^{-1}$ | 187.7  | 172.3  | 177.5  | 90.1   | 91.5   |
| x= 0.6             | Shift/ $\text{cm}^{-1}$ | 1197.2 | 1350.1 | 1502.4 | 1593.6 | 1688.0 |
| $I_G/I_{D1}=0.471$ | FWHM / $\text{cm}^{-1}$ | 191.1  | 172.9  | 141.3  | 93.8   | 122.1  |
| x= 0.8             | Shift/ $\text{cm}^{-1}$ | 1197.8 | 1341.7 | 1499.3 | 1593.0 | 1687.3 |
| $I_G/I_{D1}=0.462$ | FWHM / $\text{cm}^{-1}$ | 160.9  | 159.2  | 156.9  | 88.3   | 53.49  |
| x= 1.0             | Shift/ $\text{cm}^{-1}$ | 1194.1 | 1346.0 | 1501.2 | 1594.3 | 1688.0 |
| $I_G/I_{D1}=0.491$ | FWHM / $\text{cm}^{-1}$ | 162.88 | 164.0  | 146.6  | 89.2   | 101.7  |

<sup>1</sup>Raman shift; <sup>2</sup>Full width at half maximum.

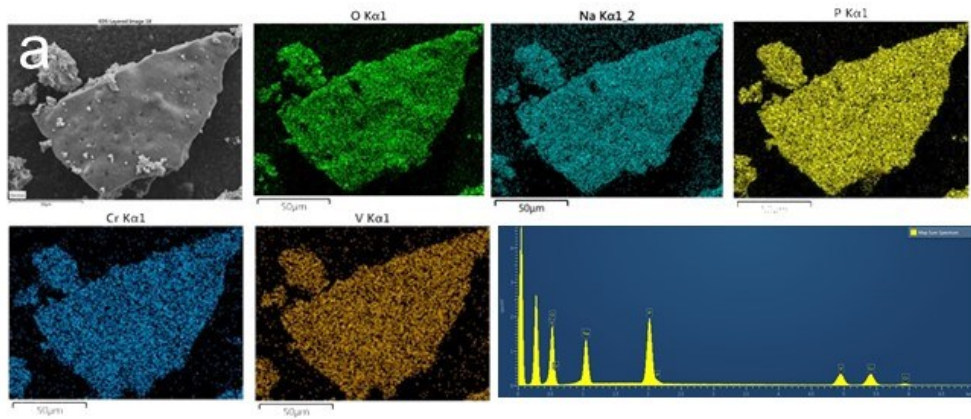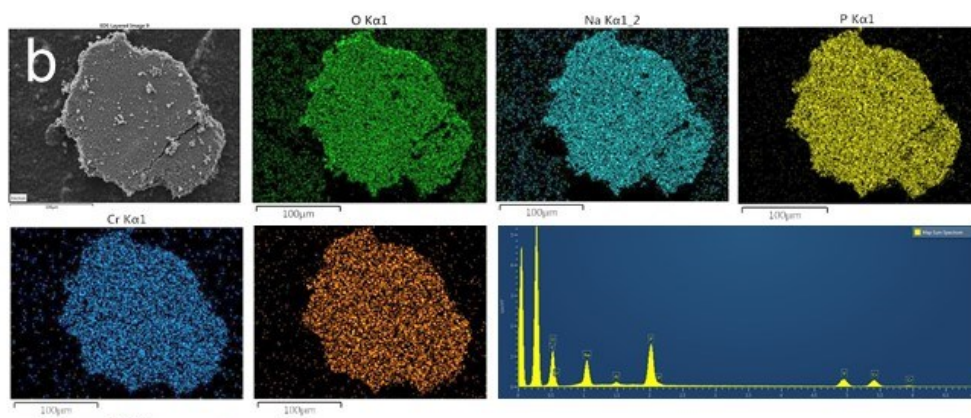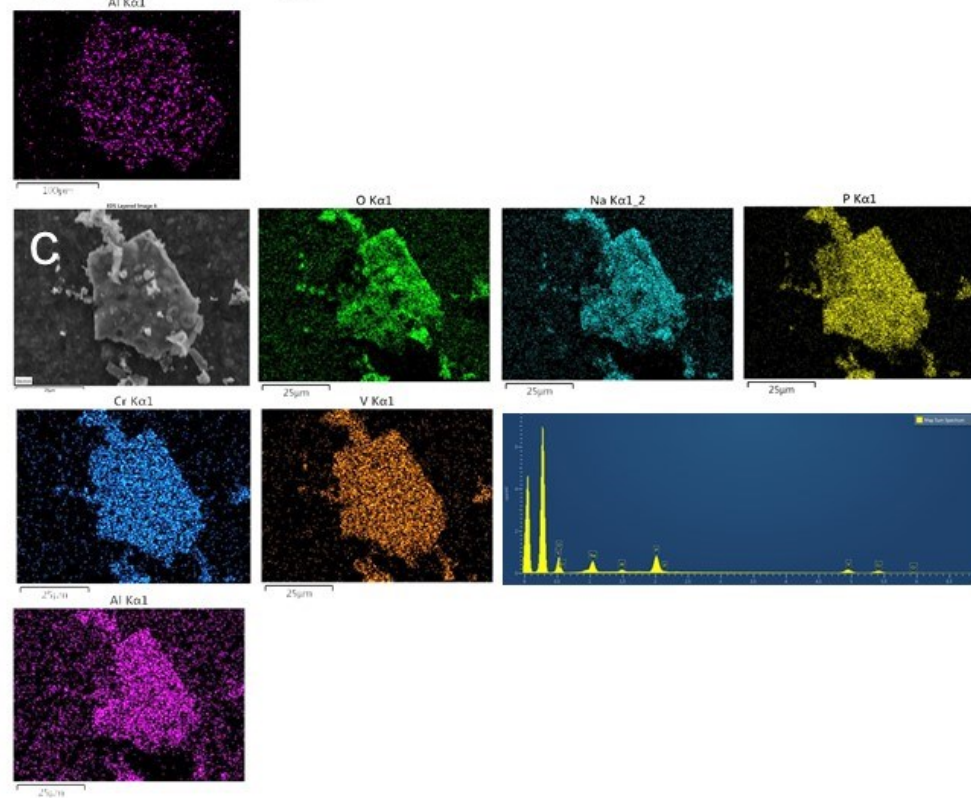

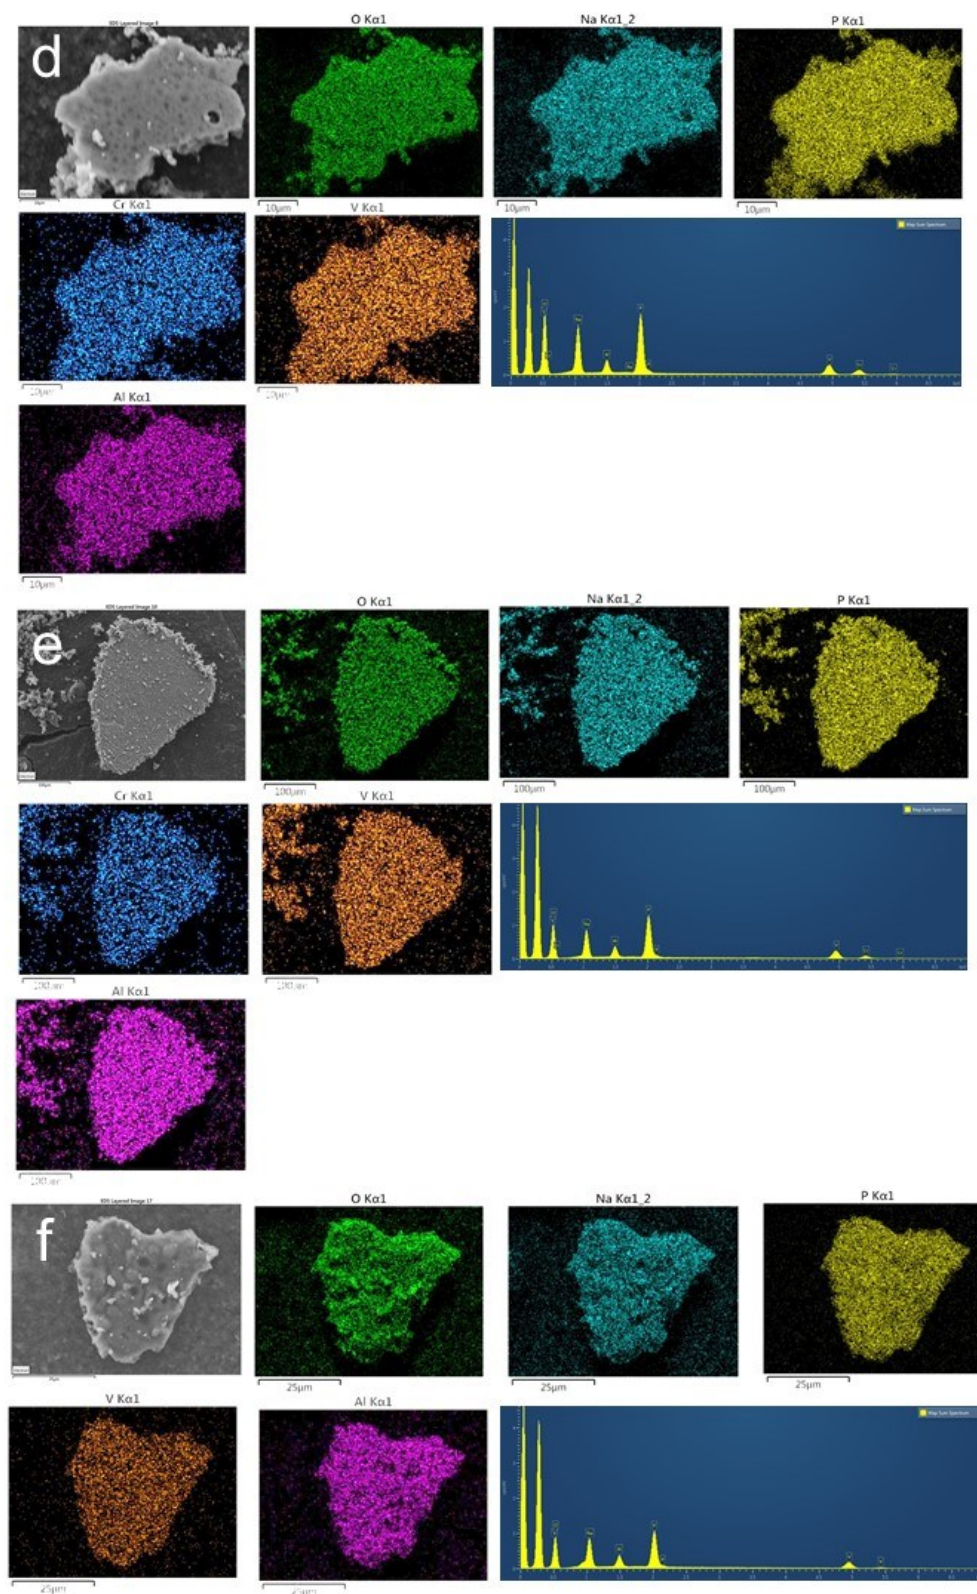

**Figure S1.** EDX spectra and maps for elements Na, V, Cr, Al, P, O recorded for raw samples with a)  $x = 0.0$ ; b)  $x = 0.2$ ; c)  $x = 0.4$ , d)  $x = 0.6$ , e)  $x = 0.8$  and f)  $x = 1.0$ .

**Table S2.** Nominal and actual stoichiometry determined by EDX.

| Nominal stoichiometry                                       | Actual stoichiometry from EDX                                                                       |
|-------------------------------------------------------------|-----------------------------------------------------------------------------------------------------|
| $\text{Na}_3\text{VCr}(\text{PO}_4)_3$                      | $\text{Na}_{3.16}\text{V}_{0.86}\text{Cr}_{0.87}(\text{P}_{0.96}\text{O}_{4.08})_3$                 |
| $\text{Na}_3\text{VAl}_{0.2}\text{Cr}_{0.8}(\text{PO}_4)_3$ | $\text{Na}_{2.80}\text{V}_{0.89}\text{Al}_{0.19}\text{Cr}_{0.74}(\text{P}_{0.98}\text{O}_{4.14})_3$ |
| $\text{Na}_3\text{VAl}_{0.4}\text{Cr}_{0.6}(\text{PO}_4)_3$ | $\text{Na}_{2.80}\text{V}_{0.96}\text{Al}_{0.38}\text{Cr}_{0.6}(\text{P}_{0.94}\text{O}_{4.14})_3$  |
| $\text{Na}_3\text{VAl}_{0.6}\text{Cr}_{0.4}(\text{PO}_4)_3$ | $\text{Na}_{3.28}\text{V}_{0.8}\text{Al}_{0.64}\text{Cr}_{0.32}(\text{P}_{0.94}\text{O}_{4.04})_3$  |
| $\text{Na}_3\text{VAl}_{0.8}\text{Cr}_{0.2}(\text{PO}_4)_3$ | $\text{Na}_{2.87}\text{V}_{0.91}\text{Al}_{0.76}\text{Cr}_{0.2}(\text{P}_{0.96}\text{O}_{4.12})_3$  |
| $\text{Na}_3\text{VAl}(\text{PO}_4)_3$                      | $\text{Na}_{3.05}\text{V}_{0.85}\text{Al}_{0.93}(\text{P}_{0.97}\text{O}_{4.09})_3$                 |

**a**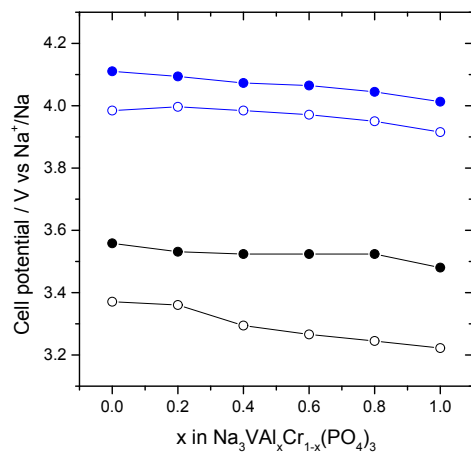**b**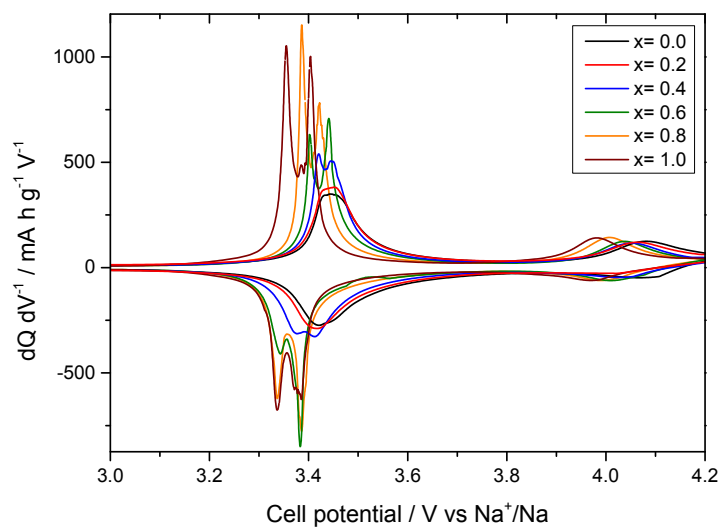

**Figure S2.** a) Plot of cell potential versus x in Na<sub>3</sub>VCr<sub>1-x</sub>Al<sub>x</sub>(PO<sub>4</sub>)<sub>3</sub>; b) Differential capacity plots of the galvanostatic charge and discharge curves for Na<sub>3</sub>VCr<sub>1-x</sub>Al<sub>x</sub>(PO<sub>4</sub>)<sub>3</sub> (0 ≤ x ≤ 1) samples, recorded at C/10.

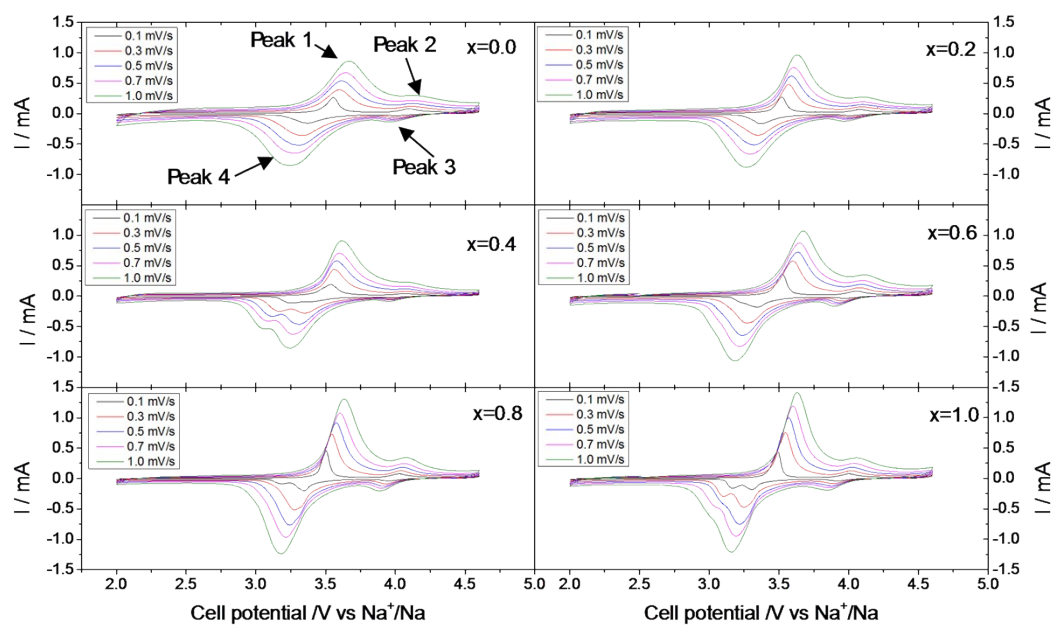

**Figure S3.** Cyclic voltammograms recorded for  $\text{Na}_3\text{VCr}_{1-x}\text{Al}_x(\text{PO}_4)_3$  samples at several scan rates from 0.1 to 1  $\text{mV s}^{-1}$  within the potential window of 2-4.6 V vs  $\text{Na}^+/\text{Na}$ . Peaks used for the calculation of diffusion coefficients have been labelled.

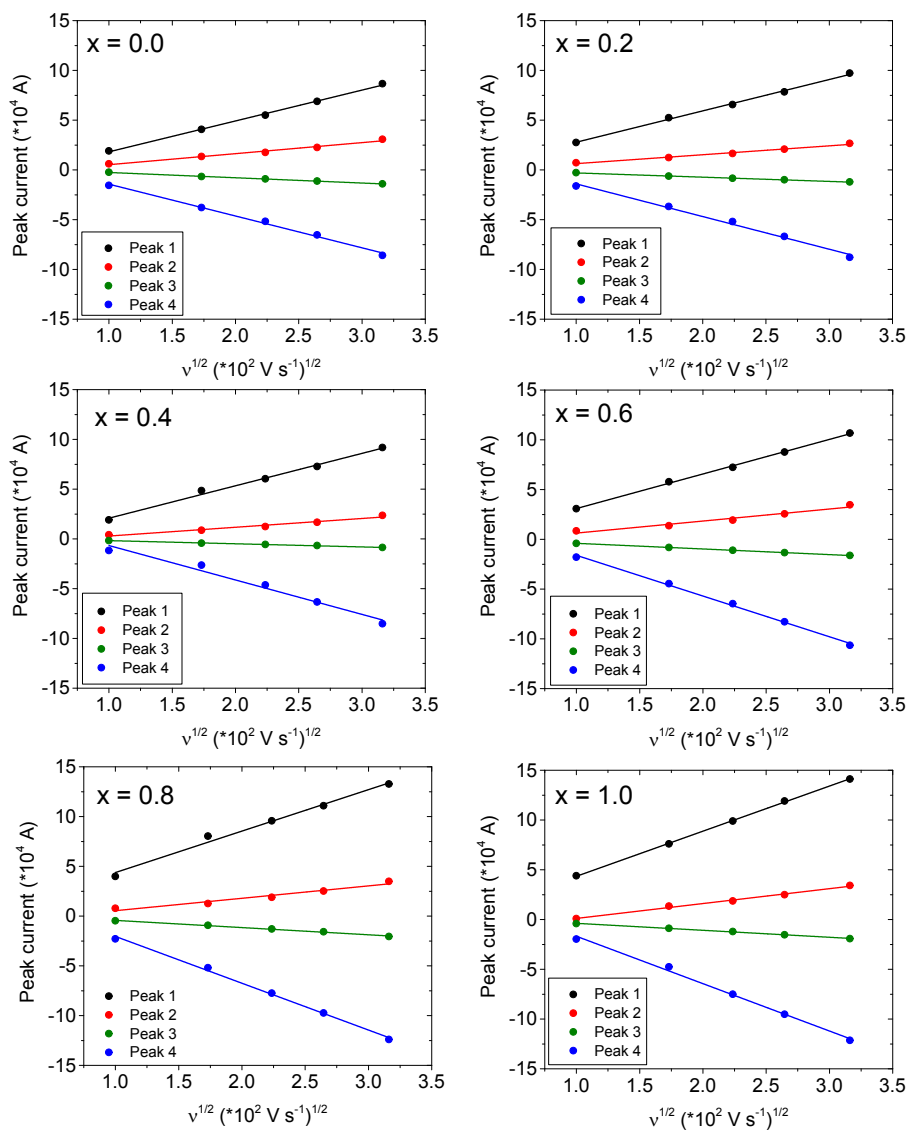

**Figure S4.** Linear plots liner relationship of the peak current ( $I_p$ ) versus the square root of the scan rate ( $v^{1/2}$ ) of  $\text{Na}_3\text{VCr}_{1-x}\text{Al}_x(\text{PO}_4)_3$  ( $x= 0.0, 0.2, 0.4, 0.6, 0.8, 1.0$ ) samples with the peaks current against the square root of scan rate.

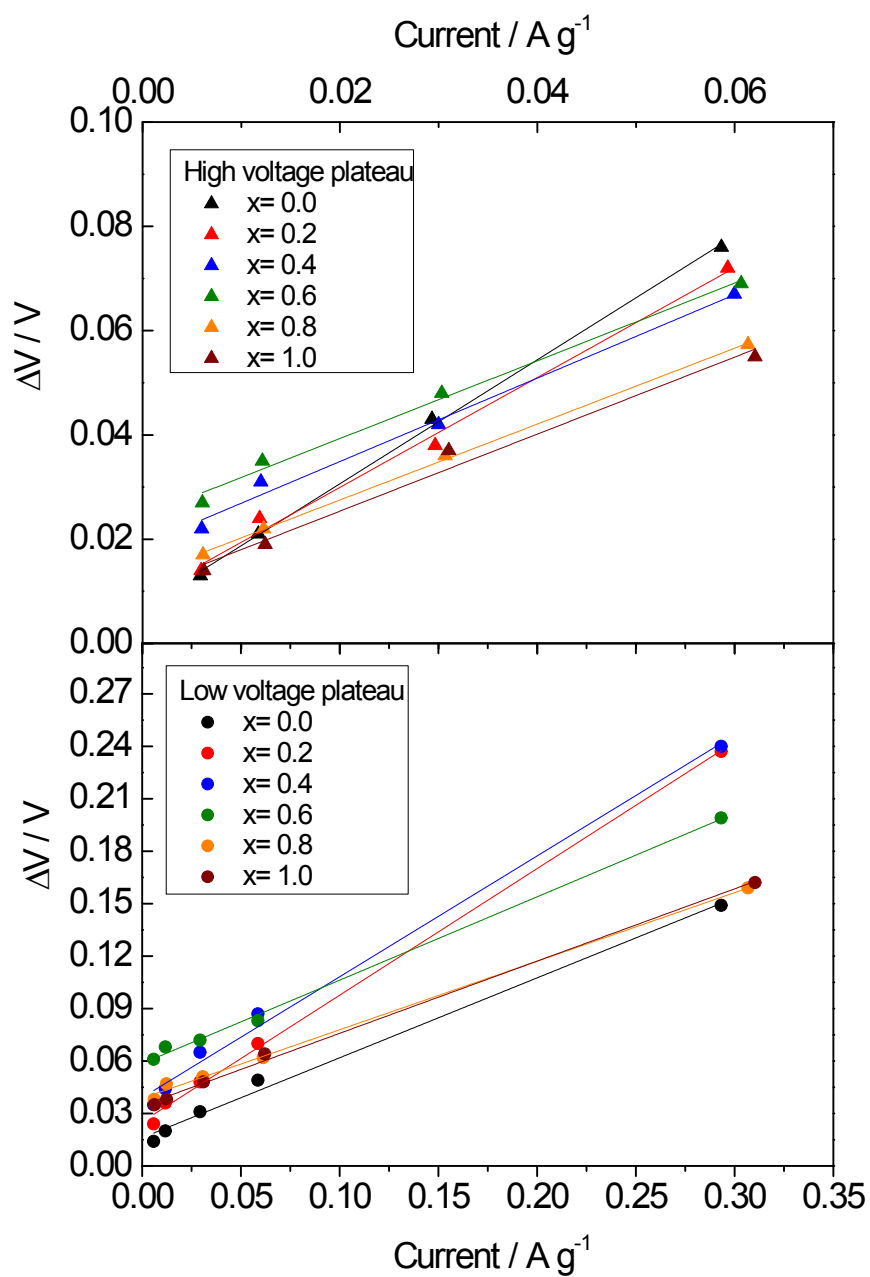

**Figure S5.** Plots of charge-discharge cell hysteresis ( $\Delta V$ ) versus applied current determined for both high and low voltage plateaus in the studied samples.



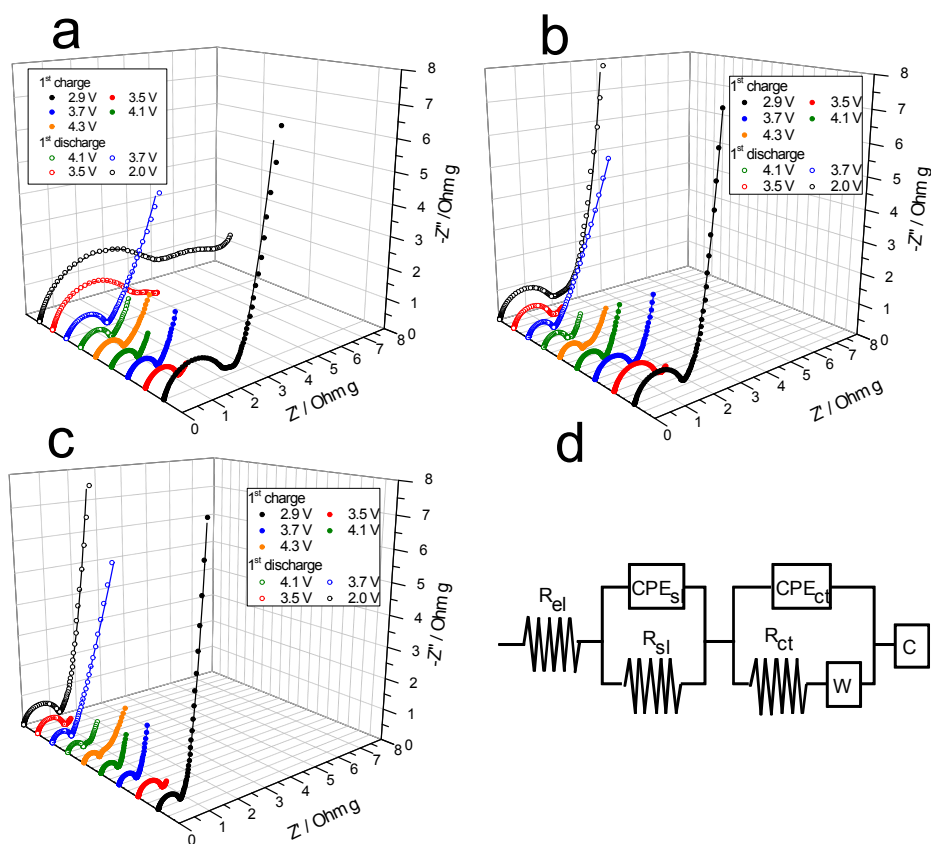

**Figure S6.** Experimental and fitted Nyquist plots of  $\text{Na}_3\text{VCr}_{1-x}\text{Al}_x(\text{PO}_4)_3$  recorded for  $\text{Na}_3\text{VCr}_{1-x}\text{Al}_x(\text{PO}_4)_3$  samples with  $x =$  a)  $x = 0.0$ , b)  $x = 0.2$  and c)  $x = 1.0$  at different depths of charge and discharge at a  $C/10$ ; d) Equivalent circuit used for the fitting of the spectra.

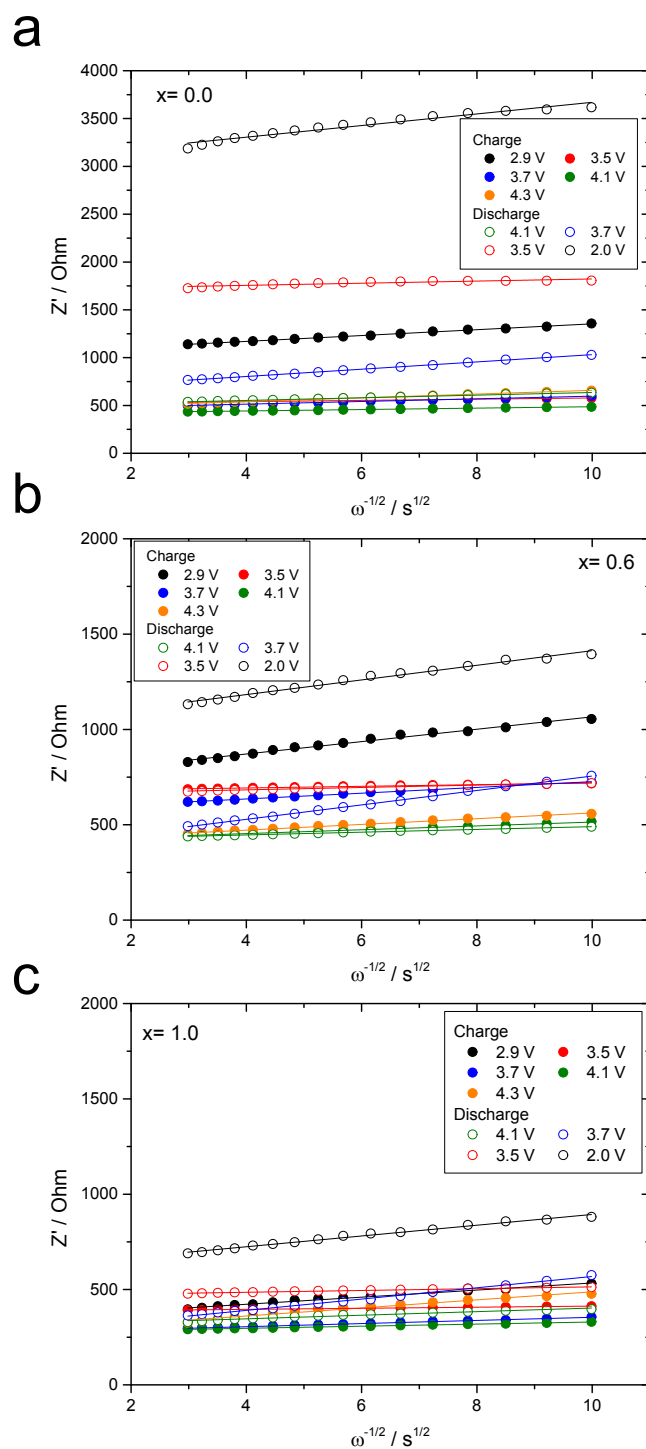

**Figure S7.** Linear plots of the real impedance versus the reciprocal square root of frequency, employed for the calculation of apparent diffusion coefficients of  $\text{Na}_3\text{VCr}_{1-x}\text{Al}_x(\text{PO}_4)_3$  samples with  $x =$  a) 0.0, b) 0.2 and c) 1.0 at different depths of charge and discharge.
